# Supplementary material for: Tick-Borne Encephalitis Specific Lymphocyte Response after Allogeneic Hematopoietic Stem Cell Transplantation Predicts Humoral Immunity after Vaccination
Source: MDPI journal article supplement (doi:10.3390/vaccines9080908), 2021-08-15

**Table S1.** Antibodies used for cytokine detection with Luminex system (Luminex 100SI, Biomedica, Vienna, Austria)

| Luminex<br>Microspheres<br>Bead region | Standard           |                   |           | Antibody<br>specificity | Capture Antibody |                   |             | Biotinylated Detection Antibody |                   |             |
|----------------------------------------|--------------------|-------------------|-----------|-------------------------|------------------|-------------------|-------------|---------------------------------|-------------------|-------------|
|                                        | Standard<br>entity | Catalog<br>number | Company   |                         | Clone            | Catalog<br>number | Company     | Clone                           | Catalog<br>number | Company     |
| 006                                    | IL-2               | 200-02-10µg       | Peprotech | IL-2                    | MQ1-17H12        | 14-7029-85        | eBioscience | Polyclonal                      | 13-7028-85        | eBioscience |
| 021                                    | IL-10              | 200-10-2µg        | Peprotech | IL-10                   | JES3-9D7         | 14-7108-85        | eBioscience | JES3-12G8                       | 13-7109-85        | eBioscience |
| 035                                    | IL-13              | 200-13-2µg        | Peprotech | IL-13                   | JES10-5A2        | 501902            | Biolegend   | Poly5020                        | 502001            | Biolegend   |
| 048                                    | GM-CSF             | 572902            | Biolegend | GM-CSF                  | BVD2-23B6        | 502202            | Biolegend   | BVD2-21C11                      | 502304            | Biolegend   |
| 074                                    | IFN $\gamma$       | 300-02-20µg       | Peprotech | IFN $\gamma$            | MD-1             | 507502            | Biolegend   | 4S.B3                           | 502504            | Biolegend   |
| 041                                    | TNF $\alpha$       | 300-01A-10µg      | Peprotech | TNF $\alpha$            | MAb1             | 502802            | Biolegend   | MAb11                           | 502904            | Biolegend   |

**Table S2:** The following table shows immune reconstitution data from all patients at baseline (= before first vaccination). Lymphocyte subgroups were differentiated by FACS (fluorescence-activated cell scanning) from unstimulated cells.

| Patient             | Lymphocytes      | T-lymphocytes                    | CD4+ cells                       | CD8+ cells      | CD4+ memory   | CD4+ naive    | CD8+ memory  | CD8+ naive   | B-Lymphocytes  | class switched | non-class switched | naive     | immature  | transitional | plasma blasts |
|---------------------|------------------|----------------------------------|----------------------------------|-----------------|---------------|---------------|--------------|--------------|----------------|----------------|--------------------|-----------|-----------|--------------|---------------|
| <i>Normal range</i> | <i>1000-4000</i> | <i>m 590-2000<br/>f 770-2200</i> | <i>m 360-1350<br/>f 310-1570</i> | <i>280-1000</i> | <i>35-89%</i> | <i>12-78%</i> | <i>8-29%</i> | <i>8-29%</i> | <i>110-530</i> | <i>7-39%</i>   | <i>5-57%</i>       | <i>NA</i> | <i>NA</i> | <i>NA</i>    | <i>NA</i>     |
| Unit                | absolut/<br>μl   | absolut/<br>μl                   | absolut/<br>μl                   | absolut/<br>μl  | %CD4          | %CD4          | %CD8         | %CD8         | absolut/<br>μl | %CD19          | %CD19              | %CD19     | %CD19     | %CD19        | %CD19         |
| <b>1</b>            | 1568             | 1192                             | 470                              | 580             | 56.2          | 29.9          | 10.5         | 60.2         | 110            | 5.5            | 5.6                | 83.8      | 1.1       | 4.6          | 10.3          |
| <b>2</b>            | 1376             | 716                              | 358                              | 330             | 21.8          | 42.9          | 2.9          | 82.0         | 592            | 0.7            | 4.3                | 92        | 0.3       | 7.2          | 38.2          |
| <b>3</b>            | 1050             | 494                              | 231                              | 200             | 38.2          | 39.7          | 20.5         | 49.8         | 315            | 2.9            | 25.2               | 68.9      | 2.8       | 3.8          | 15.3          |
| <b>4</b>            | 1026             | 523                              | 257                              | 267             | 69.3          | 18.1          | 54.3         | 22.0         | 380            | 1.1            | 4.5                | 79.7      | 1.5       | 2.2          | 28.7          |
| <b>5</b>            | 2592             | 1555                             | 337                              | 1192            | 88.4          | 1.93          | 20.8         | 20.8         | 389            | 4.9            | 12                 | 76.2      | 0.8       | 15.8         | 11.1          |
| <b>6</b>            | 1840             | 1214                             | 442                              | 626             | 49.4          | 30.5          | 9.7          | 59.2         | 515            | 1              | 4.1                | 90.4      | 0.8       | 4.6          | 16.9          |
| <b>7</b>            | 1430             | 1115                             | 315                              | 758             | 62.7          | 21.7          | 14.8         | 51.1         | 129            | 0.3            | 2.5                | 95.3      | 3.7       | 31.5         | 24.7          |
| <b>8</b>            | 1204             | 999                              | 518                              | 482             | 40.5          | 23.0          | 22.5         | 30.8         | 157            | 3.9            | 16.6               | 70        | 1.6       | 14           | 7             |
| <b>9</b>            | 1280             | 576                              | 294                              | 282             | 48.1          | 3.6           | 29.6         | 12.8         | 525            | 4.1            | 8                  | 84.6      | 1.2       | 14           | 10.2          |
| <b>10</b>           | 1700             | 867                              | 527                              | 340             | 67.4          | 12.9          | 21.1         | 41.9         | 442            | 0.4            | 2                  | 94.3      | 3.6       | 38.9         | 1.3           |
| <b>11</b>           | 1800             | 648                              | 396                              | 216             | -             | -             | 22.1         | 52.9         | 810            | 1.4            | 2.2                | 92.7      | 4.1       | 57.7         | 3.1           |
| <b>12</b>           | 1178             | 766                              | 306                              | 424             | 66.3          | 20.2          | 31.9         | 30.9         | 224            | 5.6            | 6.3                | 76.7      | 1.3       | 72.7         | 4.4           |
| <b>13</b>           | 1782             | 1568                             | 321                              | 1212            | 60.7          | 17.4          | 21           | 33.1         | 71             | 16.1           | 10.9               | 66.7      | 1.5       | 23.3         | 3.8           |
| <b>14</b>           | 3224             | 1096                             | 387                              | 645             | 86.8          | 6.5           | 70.9         | 6.7          | 1709           | 4.9            | 1                  | 86.4      | 0.9       | 65.9         | 17.1          |
| <b>15</b>           | 2400             | 2232                             | 72                               | 2160            | 90.5          | 2.5           | 26.2         | 25.5         | 24             | 7.8            | 9.2                | 68        | 5.8       | 24.9         | 7.1           |
| <b>16</b>           | 1634             | 1226                             | 621                              | 458             | 49.6          | 39.9          | 18.9         | 60.1         | 327            | 3.3            | 7.1                | 82        | 1.1       | 39.5         | 5.2           |
| <b>17</b>           | 1972             | 1499                             | 394                              | 1124            | 65.2          | 15.2          | 4.4          | 62.6         | 434            | 1.7            | 3.7                | 90.1      | 1.9       | 61.8         | 10.1          |

**Table S3:** The following table shows immune reconstitution data from all patients at two different time points during the study period: 12 weeks after first vaccination and 9 to 11 months after baseline at the time of third vaccination. Lymphocyte subgroups were differentiated by FACS (fluorescence-activated cell scanning) from unstimulated cells.

| Patient             | Lymphocytes            | Lymphocytes                  | T-lymphocytes                    | T-lymphocytes                    | CD4+ cells                       | CD4+ cells                       | CD8+ cells             | CD8+ cells                   | B-lymphocytes          | B-lymphocytes                |
|---------------------|------------------------|------------------------------|----------------------------------|----------------------------------|----------------------------------|----------------------------------|------------------------|------------------------------|------------------------|------------------------------|
| <i>Normal range</i> | <i>1000-4000</i>       | <i>1000-4000</i>             | <i>m 590-2000<br/>f 770-2200</i> | <i>m 590-2000<br/>f 770-2200</i> | <i>m 360-1350<br/>f 310-1570</i> | <i>m 360-1350<br/>f 310-1570</i> | <i>280-1000</i>        | <i>280-1000</i>              | <i>110-530</i>         | <i>110-530</i>               |
| Unit                | absolut/ $\mu$ l       | absolut/ $\mu$ l             | absolut/ $\mu$ l                 | absolut/ $\mu$ l                 | absolut/ $\mu$ l                 | absolut/ $\mu$ l                 | absolut/ $\mu$ l       | absolut/ $\mu$ l             | absolut/ $\mu$ l       | absolut/ $\mu$ l             |
| Time point          | 12 weeks post Baseline | 9 to 11 months post Baseline | 12 weeks post Baseline           | 9 to 11 months post Baseline     | 12 weeks post Baseline           | 9 to 11 months post Baseline     | 12 weeks post Baseline | 9 to 11 months post Baseline | 12 weeks post Baseline | 9 to 11 months post Baseline |
| <b>1</b>            | 1431                   | 1647                         | 1116                             | 1235                             | 529                              | 609                              | 501                    | 544                          | 186                    | 231                          |
| <b>2</b>            | 1273                   | 1862                         | 586                              | 726                              | 306                              | 354                              | 267                    | 317                          | 458                    | 1005                         |
| <b>3</b>            | 1188                   | 1560                         | 594                              | 827                              | 273                              | 359                              | 249                    | 374                          | 261                    | 390                          |
| <b>4</b>            | 1482                   | 1539                         | 904                              | 877                              | 415                              | 431                              | 489                    | 431                          | 430                    | 477                          |
| <b>5</b>            | 2640                   | 2109                         | 1558                             | 1202                             | 449                              | 380                              | 1030                   | 801                          | 528                    | 506                          |
| <b>6</b>            | 2184                   | 2310                         | 1310                             | 1247                             | 546                              | 531                              | 655                    | 624                          | 743                    | 901                          |
| <b>7</b>            | 2550                   | -                            | 1836                             | -                                | 485                              | -                                | 1275                   | -                            | 459                    | -                            |
| <b>8</b>            | 1836                   | 2021                         | 1542                             | 1556                             | 771                              | 869                              | 771                    | 687                          | 239                    | 404                          |
| <b>9</b>            | 1829                   | 1464                         | 750                              | 498                              | 311                              | 264                              | 439                    | 220                          | 695                    | 703                          |
| <b>10</b>           | 1892                   | -                            | 946                              | -                                | 530                              | -                                | 416                    | -                            | 359                    | -                            |
| <b>11</b>           | 1798                   | -                            | 575                              | -                                | 342                              | -                                | 216                    | -                            | 971                    | -                            |
| <b>12</b>           | 1150                   | -                            | 725                              | -                                | 311                              | -                                | 403                    | -                            | 207                    | -                            |
| <b>13</b>           | 2163                   | 2937                         | 1925                             | 2526                             | 346                              | 529                              | 1514                   | 1968                         | 87                     | 206                          |
| <b>14</b>           | 3509                   | 3900                         | 1263                             | 1716                             | 561                              | 702                              | 667                    | 936                          | 1790                   | 1365                         |
| <b>15</b>           | 4230                   | 2668                         | 3807                             | 1948                             | 254                              | 213                              | 3596                   | 1734                         | 254                    | 560                          |
| <b>16</b>           | 3569                   | 2352                         | 2356                             | 1740                             | 1356                             | 917                              | 785                    | 612                          | 1106                   | 517                          |
| <b>17</b>           | 4410                   | 2240                         | 3396                             | 1523                             | 706                              | 403                              | 2690                   | 1120                         | 838                    | 672                          |

**Table S4.** The following table shows descriptive statistics (Mean, Standard Deviation, Median, 1<sup>st</sup> and 3<sup>rd</sup> Quantile, Minimum, Maximum and sample size N) for cellular data separately for patients and controls as well as overall. The p-values give the result for the Wilcoxon-Test comparing patients with controls. Lymphocyte proliferation has been standardized based on unstimulated control samples and is shown as stimulation index (SI).

Time: BL – Baseline; 2<sup>nd</sup> – after 2<sup>nd</sup> vaccination; 3<sup>rd</sup> – after 3<sup>rd</sup> vaccination. TBE: tick borne encephalitis antigen; CEFT: CMV, EBV, influenza virus and Clostridium tetani antigen mix; PMA/iono: phorbol myristate acetate plus ionomycin.

| Variable               | Time | Group   | Mean   | SD     | Median | Q1     | Q3     | Min    | Max    | N  | p-value |
|------------------------|------|---------|--------|--------|--------|--------|--------|--------|--------|----|---------|
| Age                    | BL   | Control | 32     | 12.81  | 29.5   | 22.75  | 34.25  | 21     | 60     | 8  | 0.3808  |
|                        |      | Patient | 38     | 14.34  | 31     | 26     | 53     | 22     | 61     | 17 |         |
|                        |      | overall | 36.08  | 13.9   | 31     | 26     | 47     | 21     | 61     | 25 |         |
| BMI                    | BL   | Control | 22.48  | 2.86   | 21.65  | 20.75  | 24.65  | 18.5   | 26.6   | 8  | 0.0359  |
|                        |      | Patient | 27.48  | 6.44   | 26.9   | 23.1   | 29.9   | 19.1   | 43.1   | 17 |         |
|                        |      | overall | 25.88  | 5.98   | 24.2   | 22.2   | 28.4   | 18.5   | 43.1   | 25 |         |
| TBE Proliferation      | BL   | Control | 1.29   | 0.67   | 0.98   | 0.88   | 1.53   | 0.61   | 2.37   | 8  | 0.0019  |
|                        |      | Patient | 13.29  | 18.2   | 4.15   | 1.45   | 24.34  | 1.02   | 69.7   | 17 |         |
|                        |      | overall | 9.45   | 15.92  | 2.22   | 1.04   | 9.42   | 0.61   | 69.7   | 25 |         |
|                        | 2nd  | Control | 10.25  | 8.37   | 8.3    | 4.29   | 12.92  | 1.75   | 23.93  | 8  | 0.9773  |
|                        |      | Patient | 18.33  | 22.08  | 8.43   | 1.55   | 27.54  | 0.67   | 76.56  | 17 |         |
|                        |      | overall | 15.74  | 18.98  | 8.43   | 1.75   | 22.8   | 0.67   | 76.56  | 25 |         |
|                        | 3rd  | Control | 14.55  | 9.7    | 12.99  | 10.9   | 19.28  | 1.79   | 27.79  | 5  | 0.5663  |
|                        |      | Patient | 26.63  | 30.57  | 21.02  | 2.68   | 25.51  | 0.84   | 109.31 | 13 |         |
|                        |      | overall | 23.28  | 26.7   | 17.24  | 4.74   | 25.32  | 0.84   | 109.31 | 18 |         |
| CEFT Proliferation     | BL   | Control | 58.62  | 37.01  | 53.87  | 40.23  | 68.26  | 13.34  | 134.64 | 8  | 0.0003  |
|                        |      | Patient | 13.91  | 14.55  | 8.55   | 1.57   | 24.59  | 1.13   | 45.2   | 17 |         |
|                        |      | overall | 28.21  | 31.52  | 21.69  | 2.61   | 45.2   | 1.13   | 134.64 | 25 |         |
|                        | 2nd  | Control | 44.37  | 23.29  | 45.27  | 23.57  | 59.98  | 14.02  | 77.59  | 8  | 0.0005  |
|                        |      | Patient | 12.45  | 14.06  | 5.3    | 2      | 18.81  | 0.84   | 45.1   | 17 |         |
|                        |      | overall | 22.66  | 22.82  | 14.02  | 4.38   | 37.69  | 0.84   | 77.59  | 25 |         |
|                        | 3rd  | Control | 42.47  | 30.4   | 47.97  | 18.49  | 57.59  | 6.36   | 81.95  | 5  | 0.3359  |
|                        |      | Patient | 26.98  | 21.9   | 17.3   | 10.99  | 35.4   | 2.4    | 66.92  | 13 |         |
|                        |      | overall | 31.28  | 24.64  | 18.41  | 11.57  | 53.43  | 2.4    | 81.95  | 18 |         |
| PMA/iono Proliferation | BL   | Control | 239    | 104.88 | 263.19 | 183.08 | 309.21 | 85.41  | 374.98 | 8  | 0.0109  |
|                        |      | Patient | 131.44 | 125.23 | 72.24  | 64.81  | 153.72 | 40.28  | 532.1  | 17 |         |
|                        |      | overall | 165.86 | 127.62 | 94.69  | 67.64  | 255.1  | 40.28  | 532.1  | 25 |         |
|                        | 2nd  | Control | 202.67 | 145.51 | 152.03 | 86.43  | 359.89 | 51.72  | 392.65 | 8  | 0.4063  |
|                        |      | Patient | 141.43 | 96.85  | 105.33 | 76.72  | 178.32 | 40.67  | 379.03 | 17 |         |
|                        |      | overall | 161.03 | 115.24 | 129.72 | 76.72  | 208.53 | 40.67  | 392.65 | 25 |         |
|                        | 3rd  | Control | 184.14 | 55.05  | 220.44 | 152.04 | 222    | 102.06 | 224.18 | 5  | 0.0194  |
|                        |      | Patient | 113.74 | 147.45 | 60.92  | 43.21  | 113.89 | 21.89  | 586.07 | 13 |         |
|                        |      | overall | 133.3  | 130.81 | 105.47 | 48.56  | 150.11 | 21.89  | 586.07 | 18 |         |
| IFN $\gamma$           | BL   | Control | 3.31   | 2.11   | 2.81   | 1.52   | 4.68   | 1.34   | 7.03   | 8  | 0.4063  |
|                        |      | Patient | 32.97  | 60.05  | 5.36   | 1.25   | 44.35  | 0.44   | 233.91 | 17 |         |
|                        |      | overall | 23.48  | 51.04  | 4.65   | 1.39   | 8.47   | 0.44   | 233.91 | 25 |         |
|                        | 2nd  | Control | 15.96  | 20.83  | 8.79   | 4.66   | 16.14  | 1.91   | 65.06  | 8  | 0.1747  |

|              |     |         |       |       |       |       |       |      |        |    |        |
|--------------|-----|---------|-------|-------|-------|-------|-------|------|--------|----|--------|
|              |     | Patient | 45.79 | 96.92 | 2.27  | 1.5   | 5.95  | 0.45 | 359.61 | 17 |        |
|              |     | overall | 36.24 | 81.18 | 5.2   | 1.91  | 14.71 | 0.45 | 359.61 | 25 |        |
|              | 3rd | Control | 26.58 | 24.42 | 19.89 | 10.49 | 38.58 | 1.33 | 62.63  | 5  | 0.6331 |
|              |     | Patient | 73.93 | 99.16 | 48.64 | 3     | 92.06 | 0.76 | 327.85 | 13 |        |
|              |     | overall | 60.78 | 86.94 | 29.24 | 3.05  | 68.5  | 0.76 | 327.85 | 18 |        |
| IL2          | BL  | Control | 1.14  | 0.58  | 1     | 0.76  | 1.27  | 0.6  | 2.35   | 8  | 0.0266 |
|              |     | Patient | 16.6  | 35.76 | 4.91  | 1.11  | 10.77 | 0.61 | 146.61 | 17 |        |
|              |     | overall | 11.65 | 30.11 | 1.19  | 0.94  | 6.36  | 0.6  | 146.61 | 25 |        |
|              | 2nd | Control | 3.08  | 2.55  | 2.47  | 1.33  | 3.37  | 0.97 | 8.71   | 8  | 0.2622 |
|              |     | Patient | 18.27 | 34.33 | 8.1   | 1.31  | 16.35 | 0.41 | 142.96 | 17 |        |
|              |     | overall | 13.41 | 28.98 | 3.04  | 1.31  | 14.28 | 0.41 | 142.96 | 25 |        |
|              | 3rd | Control | 10.71 | 17.32 | 4.1   | 2.23  | 4.66  | 1    | 41.59  | 5  | 0.8490 |
|              |     | Patient | 14.63 | 24.83 | 5.51  | 1.96  | 16.88 | 0.68 | 93.37  | 13 |        |
|              |     | overall | 13.54 | 22.56 | 4.38  | 2.02  | 16.38 | 0.68 | 93.37  | 18 |        |
| IL10         | BL  | Control | 1.21  | 0.23  | 1.22  | 1.18  | 1.24  | 0.8  | 1.63   | 8  | 0.2770 |
|              |     | Patient | 5.87  | 7.96  | 1.95  | 1     | 7.78  | 1    | 28.53  | 17 |        |
|              |     | overall | 4.38  | 6.87  | 1.22  | 1     | 3.64  | 0.8  | 28.53  | 25 |        |
|              | 2nd | Control | 2.89  | 2.84  | 1.37  | 1.2   | 3.47  | 0.95 | 8.92   | 8  | 0.9302 |
|              |     | Patient | 6.65  | 14.47 | 1.74  | 1     | 4.34  | 0.26 | 61.22  | 17 |        |
|              |     | overall | 5.44  | 12.05 | 1.51  | 1     | 4.34  | 0.26 | 61.22  | 25 |        |
|              | 3rd | Control | 2.29  | 0.9   | 2.06  | 1.74  | 3.11  | 1.22 | 3.31   | 5  | 0.7670 |
|              |     | Patient | 23.51 | 26.22 | 6.9   | 1     | 39.92 | 0.14 | 63.23  | 13 |        |
|              |     | overall | 17.61 | 24.1  | 2.59  | 1.05  | 35.86 | 0.14 | 63.23  | 18 |        |
| IL13         | BL  | Control | 0.63  | 0.08  | 0.61  | 0.61  | 0.61  | 0.57 | 0.84   | 8  | 0.0001 |
|              |     | Patient | 16.04 | 28.93 | 1     | 1     | 20.62 | 0.96 | 98.93  | 17 |        |
|              |     | overall | 11.11 | 24.73 | 1     | 0.61  | 2.87  | 0.57 | 98.93  | 25 |        |
|              | 2nd | Control | 2.7   | 2.05  | 2.07  | 1.08  | 4.02  | 0.6  | 5.89   | 8  | 0.2779 |
|              |     | Patient | 29.36 | 58.55 | 5.61  | 1     | 18.35 | 0.96 | 184.11 | 17 |        |
|              |     | overall | 20.83 | 49.48 | 2.16  | 1     | 11.27 | 0.6  | 184.11 | 25 |        |
|              | 3rd | Control | 3.83  | 2.45  | 3.41  | 2.95  | 4.97  | 0.61 | 7.21   | 5  | 0.1390 |
|              |     | Patient | 44.51 | 51.03 | 32.26 | 1     | 66.93 | 0.53 | 153.83 | 13 |        |
|              |     | overall | 33.21 | 46.81 | 8.44  | 1.49  | 40.64 | 0.53 | 153.83 | 18 |        |
| TNF $\alpha$ | BL  | Control | 0.87  | 0.54  | 0.71  | 0.56  | 1.18  | 0.28 | 1.93   | 8  | 0.0289 |
|              |     | Patient | 7.54  | 15.16 | 1.43  | 1     | 3.97  | 0.29 | 47.44  | 17 |        |
|              |     | overall | 5.41  | 12.78 | 1.19  | 0.73  | 1.94  | 0.28 | 47.44  | 25 |        |
|              | 2nd | Control | 1.13  | 0.55  | 0.94  | 0.76  | 1.36  | 0.52 | 2.08   | 8  | 0.3665 |
|              |     | Patient | 5.79  | 8.43  | 1.48  | 0.73  | 3.54  | 0.2  | 23.19  | 17 |        |
|              |     | overall | 4.3   | 7.24  | 1.1   | 0.76  | 2.64  | 0.2  | 23.19  | 25 |        |
|              | 3rd | Control | 1.2   | 0.38  | 1.32  | 1.28  | 1.35  | 0.55 | 1.51   | 5  | 0.1674 |
|              |     | Patient | 8.29  | 9.52  | 3.42  | 1.09  | 12.68 | 0.51 | 27.1   | 13 |        |
|              |     | overall | 6.32  | 8.64  | 1.91  | 1.14  | 6.74  | 0.51 | 27.1   | 18 |        |
| GM-CSF       | BL  | Control | 0.69  | 0.23  | 0.69  | 0.57  | 0.86  | 0.32 | 1      | 8  | 0.0109 |
|              |     | Patient | 13.11 | 26.82 | 1.33  | 0.94  | 13.77 | 0.33 | 111.87 | 17 |        |
|              |     | overall | 9.13  | 22.68 | 1     | 0.69  | 8.63  | 0.32 | 111.87 | 25 |        |
|              | 2nd | Control | 3.06  | 2.74  | 2.17  | 1.4   | 3.48  | 0.65 | 8.83   | 8  | 0.5875 |
|              |     | Patient | 18.16 | 33.84 | 3.68  | 1     | 9.26  | 0.34 | 109.31 | 17 |        |
|              |     | overall | 13.33 | 28.59 | 2.61  | 1     | 8.77  | 0.34 | 109.31 | 25 |        |

|  |     |         |       |       |       |      |       |      |        |    |        |
|--|-----|---------|-------|-------|-------|------|-------|------|--------|----|--------|
|  | 3rd | Control | 4.49  | 5.63  | 1.68  | 1.38 | 4.57  | 0.63 | 14.21  | 5  | 0.2460 |
|  |     | Patient | 22.33 | 33.7  | 10.33 | 1.03 | 28.94 | 0.63 | 126.68 | 13 |        |
|  |     | overall | 17.38 | 29.61 | 6.82  | 1.11 | 24.68 | 0.63 | 126.68 | 18 |        |

**Table S5.** The following table shows descriptive statistics for cellular data separately for humoral responders and non-responders (response was defined as an NT  $\geq 10$  and at least two-fold increase in titers after two vaccinations). The p-values give the result for the Wilcoxon-Test for the comparison between responders and non-responders.

| Variable      | Time | Responder | Mean   | SD     | Median | Q1    | Q3     | Min   | Max    | N  | p-value |
|---------------|------|-----------|--------|--------|--------|-------|--------|-------|--------|----|---------|
| Age           | BL   | No        | 41.09  | 14.02  | 43     | 26.5  | 54     | 22    | 58     | 11 | 0.4493  |
|               |      | Yes       | 32.33  | 14.33  | 27     | 26.25 | 30     | 22    | 61     | 6  |         |
|               |      | overall   | 38     | 14.34  | 31     | 26    | 53     | 22    | 61     | 17 |         |
| BMI           | BL   | No        | 28.55  | 5.86   | 27.8   | 24.1  | 30.7   | 22.7  | 43.1   | 11 | 0.2275  |
|               |      | Yes       | 25.53  | 7.54   | 23.25  | 20.4  | 27.6   | 19.1  | 39.1   | 6  |         |
|               |      | overall   | 27.48  | 6.44   | 26.9   | 23.1  | 29.9   | 19.1  | 43.1   | 17 |         |
| TBE           | BL   | No        | 2.91   | 2.57   | 1.53   | 1.32  | 3.75   | 1.02  | 9.42   | 11 | 0.0002  |
| Proliferation |      | Yes       | 32.33  | 19.35  | 27.93  | 25.11 | 30.35  | 13.06 | 69.7   | 6  |         |
|               |      | overall   | 13.29  | 18.2   | 4.15   | 1.45  | 24.34  | 1.02  | 69.7   | 17 |         |
|               | 2nd  | No        | 6.87   | 10.02  | 1.72   | 1.3   | 6.79   | 0.67  | 31.55  | 11 | 0.0019  |
|               |      | Yes       | 39.35  | 23.25  | 35.84  | 23.98 | 50.33  | 12.66 | 76.56  | 6  |         |
|               |      | overall   | 18.33  | 22.08  | 8.43   | 1.55  | 27.54  | 0.67  | 76.56  | 17 |         |
|               | 3rd  | No        | 22.45  | 39.41  | 2.68   | 1.8   | 20.36  | 0.84  | 109.31 | 7  | 0.1807  |
|               |      | Yes       | 31.52  | 18.06  | 23.77  | 21.46 | 38.21  | 14.8  | 63.05  | 6  |         |
|               |      | overall   | 26.63  | 30.57  | 21.02  | 2.68  | 25.51  | 0.84  | 109.31 | 13 |         |
| CEFT          | BL   | No        | 6.77   | 10.59  | 2.21   | 1.46  | 6.01   | 1.13  | 36.13  | 11 | 0.0048  |
| Proliferation |      | Yes       | 27     | 11.65  | 24.62  | 22.41 | 32.16  | 11.21 | 45.2   | 6  |         |
|               |      | overall   | 13.91  | 14.55  | 8.55   | 1.57  | 24.59  | 1.13  | 45.2   | 17 |         |
|               | 2nd  | No        | 4.86   | 5.49   | 2.79   | 1.48  | 5.26   | 0.84  | 19.44  | 11 | 0.0011  |
|               |      | Yes       | 26.38  | 14.6   | 26.61  | 13.09 | 36.87  | 11.08 | 45.1   | 6  |         |
|               |      | overall   | 12.45  | 14.06  | 5.3    | 2     | 18.81  | 0.84  | 45.1   | 17 |         |
|               | 3rd  | No        | 15.26  | 9.69   | 13.34  | 10.84 | 17.82  | 2.4   | 33.76  | 7  | 0.1014  |
|               |      | Yes       | 40.64  | 24.95  | 45.32  | 20.39 | 60.87  | 8.17  | 66.92  | 6  |         |
|               |      | overall   | 26.98  | 21.9   | 17.3   | 10.99 | 35.4   | 2.4   | 66.92  | 13 |         |
| PMA/iono      | BL   | No        | 151.74 | 150.64 | 72.24  | 65.54 | 172.21 | 40.28 | 532.1  | 11 | 0.6605  |
| Proliferation |      | Yes       | 94.23  | 47.26  | 72.52  | 62.97 | 118.79 | 54.37 | 171.94 | 6  |         |
|               |      | overall   | 131.44 | 125.23 | 72.24  | 64.81 | 153.72 | 40.28 | 532.1  | 17 |         |
|               | 2nd  | No        | 142.39 | 96.34  | 105.33 | 77.88 | 172.33 | 50.56 | 379.03 | 11 | 0.7325  |
|               |      | Yes       | 139.68 | 107    | 111.54 | 57.89 | 190.79 | 40.67 | 317.11 | 6  |         |
|               |      | overall   | 141.43 | 96.85  | 105.33 | 76.72 | 178.32 | 40.67 | 379.03 | 17 |         |
|               | 3rd  | No        | 151.92 | 196.19 | 60.92  | 50.17 | 139.29 | 37.55 | 586.07 | 7  | 0.3660  |
|               |      | Yes       | 69.2   | 39.6   | 66.14  | 39.49 | 103.93 | 21.89 | 113.89 | 6  |         |
|               |      | overall   | 113.74 | 147.45 | 60.92  | 43.21 | 113.89 | 21.89 | 586.07 | 13 |         |
| IFN $\gamma$  | BL   | No        | 8.3    | 17.96  | 1.39   | 0.92  | 6.65   | 0.44  | 61.7   | 11 | 0.0031  |
|               |      | Yes       | 78.19  | 84.27  | 58.38  | 20.65 | 93.38  | 5.36  | 233.91 | 6  |         |
|               |      | overall   | 32.97  | 60.05  | 5.36   | 1.25  | 44.35  | 0.44  | 233.91 | 17 |         |
|               | 2nd  | No        | 16.45  | 48.65  | 1.57   | 1.33  | 2.25   | 0.45  | 163.11 | 11 | 0.0031  |
|               |      | Yes       | 99.58  | 141.28 | 32.01  | 5.84  | 136.65 | 5.2   | 359.61 | 6  |         |
|               |      | overall   | 45.79  | 96.92  | 2.27   | 1.5   | 5.95   | 0.45  | 359.61 | 17 |         |
|               | 3rd  | No        | 44.31  | 78.82  | 3      | 2.47  | 47.63  | 0.76  | 206.18 | 7  | 0.1014  |
|               |      | Yes       | 108.49 | 116.12 | 64.04  | 50.89 | 123.34 | 5.42  | 327.85 | 6  |         |
|               |      | overall   | 73.93  | 99.16  | 48.64  | 3     | 92.06  | 0.76  | 327.85 | 13 |         |

|              |     |         |       |       |       |       |        |       |        |    |        |
|--------------|-----|---------|-------|-------|-------|-------|--------|-------|--------|----|--------|
| IL2          | BL  | No      | 2.55  | 2.52  | 1.19  | 0.93  | 3.75   | 0.61  | 7.55   | 11 | 0.0006 |
|              |     | Yes     | 42.35 | 53.37 | 20.07 | 12.71 | 43.25  | 6.12  | 146.61 | 6  |        |
|              |     | overall | 16.6  | 35.76 | 4.91  | 1.11  | 10.77  | 0.61  | 146.61 | 17 |        |
|              | 2nd | No      | 5.63  | 7.66  | 1.41  | 1.11  | 7.01   | 0.41  | 24.02  | 11 | 0.0071 |
|              |     | Yes     | 41.45 | 51.56 | 18.04 | 14.8  | 40.38  | 8.1   | 142.96 | 6  |        |
|              |     | overall | 18.27 | 34.33 | 8.1   | 1.31  | 16.35  | 0.41  | 142.96 | 17 |        |
|              | 3rd | No      | 15.28 | 34.48 | 1.96  | 0.9   | 4.57   | 0.68  | 93.37  | 7  | 0.0734 |
|              |     | Yes     | 13.87 | 7.21  | 15.87 | 8.95  | 18.98  | 3.34  | 21.46  | 6  |        |
|              |     | overall | 14.63 | 24.83 | 5.51  | 1.96  | 16.88  | 0.68  | 93.37  | 13 |        |
| IL10         | BL  | No      | 3.48  | 5.82  | 1     | 1     | 3.01   | 1     | 20.68  | 11 | 0.0352 |
|              |     | Yes     | 10.27 | 9.97  | 8.78  | 3.4   | 11.78  | 1.14  | 28.53  | 6  |        |
|              |     | overall | 5.87  | 7.96  | 1.95  | 1     | 7.78   | 1     | 28.53  | 17 |        |
|              | 2nd | No      | 1.64  | 1.3   | 1     | 1     | 1.98   | 0.26  | 4.09   | 11 | 0.0029 |
|              |     | Yes     | 15.83 | 22.6  | 7.13  | 4.61  | 12.25  | 1.74  | 61.22  | 6  |        |
|              |     | overall | 6.65  | 14.47 | 1.74  | 1     | 4.34   | 0.26  | 61.22  | 17 |        |
|              | 3rd | No      | 14.25 | 22.71 | 1     | 0.91  | 18.6   | 0.14  | 59.56  | 7  | 0.0985 |
|              |     | Yes     | 34.31 | 27.76 | 38.82 | 10.6  | 56.81  | 1     | 63.23  | 6  |        |
|              |     | overall | 23.51 | 26.22 | 6.9   | 1     | 39.92  | 0.14  | 63.23  | 13 |        |
| IL13         | BL  | No      | 1.21  | 0.57  | 1     | 1     | 1      | 0.96  | 2.87   | 11 | 0.0006 |
|              |     | Yes     | 43.21 | 36.16 | 23.64 | 20.75 | 65.66  | 13.63 | 98.93  | 6  |        |
|              |     | overall | 16.04 | 28.93 | 1     | 1     | 20.62  | 0.96  | 98.93  | 17 |        |
|              | 2nd | No      | 3.87  | 5.69  | 1     | 1     | 3.33   | 0.96  | 18.35  | 11 | 0.0017 |
|              |     | Yes     | 76.09 | 82.8  | 33.08 | 18.4  | 144.39 | 11.27 | 184.11 | 6  |        |
|              |     | overall | 29.36 | 58.55 | 5.61  | 1     | 18.35  | 0.96  | 184.11 | 17 |        |
|              | 3rd | No      | 17.62 | 26.71 | 1     | 0.94  | 26.51  | 0.53  | 66.93  | 7  | 0.0381 |
|              |     | Yes     | 75.89 | 56.58 | 69.99 | 32.32 | 112.44 | 15.16 | 153.83 | 6  |        |
|              |     | overall | 44.51 | 51.03 | 32.26 | 1     | 66.93  | 0.53  | 153.83 | 13 |        |
| TNF $\alpha$ | BL  | No      | 1.27  | 0.97  | 1.11  | 0.89  | 1.37   | 0.29  | 3.97   | 11 | 0.0022 |
|              |     | Yes     | 19.04 | 22.1  | 7.16  | 4.09  | 37.39  | 1.94  | 47.44  | 6  |        |
|              |     | overall | 7.54  | 15.16 | 1.43  | 1     | 3.97   | 0.29  | 47.44  | 17 |        |
|              | 2nd | No      | 2.61  | 5.72  | 0.79  | 0.65  | 1.28   | 0.2   | 19.82  | 11 | 0.0042 |
|              |     | Yes     | 11.63 | 9.93  | 8.84  | 3.21  | 20.93  | 2.64  | 23.19  | 6  |        |
|              |     | overall | 5.79  | 8.43  | 1.48  | 0.73  | 3.54   | 0.2   | 23.19  | 17 |        |
|              | 3rd | No      | 5.09  | 9.76  | 1.09  | 0.62  | 2.86   | 0.51  | 27.1   | 7  | 0.0535 |
|              |     | Yes     | 12.02 | 8.49  | 9.95  | 5.76  | 19.77  | 2.69  | 22.13  | 6  |        |
|              |     | overall | 8.29  | 9.52  | 3.42  | 1.09  | 12.68  | 0.51  | 27.1   | 13 |        |
| GM-CSF       | BL  | No      | 2.61  | 5.29  | 1     | 0.63  | 1.21   | 0.33  | 18.43  | 11 | 0.0011 |
|              |     | Yes     | 32.35 | 39.49 | 18.79 | 12.18 | 24.22  | 8.63  | 111.87 | 6  |        |
|              |     | overall | 13.11 | 26.82 | 1.33  | 0.94  | 13.77  | 0.33  | 111.87 | 17 |        |
|              | 2nd | No      | 11.43 | 32.49 | 1.07  | 0.56  | 3.14   | 0.34  | 109.31 | 11 | 0.0048 |
|              |     | Yes     | 30.5  | 35.66 | 16.57 | 8.89  | 33.01  | 5.68  | 99.37  | 6  |        |
|              |     | overall | 18.16 | 33.84 | 3.68  | 1     | 9.26   | 0.34  | 109.31 | 17 |        |
|              | 3rd | No      | 24.65 | 46.43 | 1.03  | 0.91  | 21.18  | 0.63  | 126.68 | 7  | 0.3660 |
|              |     | Yes     | 19.64 | 11.07 | 22.08 | 9.65  | 28.52  | 6.39  | 31.08  | 6  |        |
|              |     | overall | 22.33 | 33.7  | 10.33 | 1.03  | 28.94  | 0.63  | 126.68 | 13 |        |

**Table S6.** The following table shows descriptive statistics for cellular data separately for patients with related and unrelated donor. The p-values give the result for the Wilcoxon-Test for the comparison between groups.

| Variable      | Time | Donor       | Mean   | SD     | Median | Q1    | Q3     | Min   | Max    | N  | p.value |
|---------------|------|-------------|--------|--------|--------|-------|--------|-------|--------|----|---------|
| Age           | BL   | Non-related | 45.12  | 13.71  | 50     | 39    | 55.25  | 22    | 58     | 8  | 0.101   |
|               |      | related     | 31.67  | 12.29  | 27     | 26    | 31     | 22    | 61     | 9  |         |
|               |      | overall     | 38     | 14.34  | 31     | 26    | 53     | 22    | 61     | 17 |         |
| BMI           | BL   | Non-related | 29.36  | 5.29   | 29.15  | 26.62 | 31.73  | 22.7  | 39.1   | 8  | 0.178   |
|               |      | related     | 25.81  | 7.2    | 24     | 23.1  | 26.9   | 19.1  | 43.1   | 9  |         |
|               |      | overall     | 27.48  | 6.44   | 26.9   | 23.1  | 29.9   | 19.1  | 43.1   | 17 |         |
| TBE           | BL   | Non-related | 4.8    | 9.57   | 1.45   | 1.17  | 1.7    | 1.02  | 28.45  | 8  | 0.004   |
| Proliferation |      | related     | 20.84  | 21.12  | 13.06  | 5.15  | 27.41  | 3.35  | 69.7   | 9  |         |
|               |      | overall     | 13.29  | 18.2   | 4.15   | 1.45  | 24.34  | 1.02  | 69.7   | 17 |         |
|               | 2nd  | Non-related | 8.27   | 17.89  | 1.6    | 1     | 3.48   | 0.67  | 52.4   | 8  | 0.015   |
|               |      | related     | 27.28  | 22.45  | 22.8   | 12.66 | 31.55  | 1.55  | 76.56  | 9  |         |
|               |      | overall     | 18.33  | 22.08  | 8.43   | 1.55  | 27.54  | 0.67  | 76.56  | 17 |         |
|               | 3rd  | Non-related | 4.38   | 5.86   | 2.07   | 1.52  | 2.68   | 0.84  | 14.8   | 5  | 0.002   |
|               |      | related     | 40.54  | 31.74  | 25.13  | 22.35 | 47.78  | 15.21 | 109.31 | 8  |         |
|               |      | overall     | 26.63  | 30.57  | 21.02  | 2.68  | 25.51  | 0.84  | 109.31 | 13 |         |
| CEFT          | BL   | Non-related | 9.48   | 12.83  | 2.84   | 1.35  | 11.83  | 1.13  | 36.13  | 8  | 0.167   |
| Proliferation |      | related     | 17.85  | 15.57  | 14.59  | 2.61  | 24.65  | 1.53  | 45.2   | 9  |         |
|               |      | overall     | 13.91  | 14.55  | 8.55   | 1.57  | 24.59  | 1.13  | 45.2   | 17 |         |
|               | 2nd  | Non-related | 3.86   | 3.48   | 3.19   | 1.08  | 5.23   | 0.84  | 11.08  | 8  | 0.011   |
|               |      | related     | 20.09  | 15.68  | 18.81  | 9.51  | 34.41  | 1.84  | 45.1   | 9  |         |
|               |      | overall     | 12.45  | 14.06  | 5.3    | 2     | 18.81  | 0.84  | 45.1   | 17 |         |
|               | 3rd  | Non-related | 16.44  | 11.27  | 15.38  | 13.34 | 17.3   | 2.4   | 33.76  | 5  | 0.354   |
|               |      | related     | 33.56  | 24.92  | 26.87  | 10.91 | 57.12  | 8.17  | 66.92  | 8  |         |
|               |      | overall     | 26.98  | 21.9   | 17.3   | 10.99 | 35.4   | 2.4   | 66.92  | 13 |         |
| PMA/iono      | BL   | Non-related | 117.12 | 93.64  | 71.89  | 65.91 | 118.69 | 54.37 | 322.35 | 8  | 1.000   |
| Proliferation |      | related     | 144.17 | 152.67 | 77.4   | 61.41 | 153.72 | 40.28 | 532.1  | 9  |         |
|               |      | overall     | 131.44 | 125.23 | 72.24  | 64.81 | 153.72 | 40.28 | 532.1  | 17 |         |
|               | 2nd  | Non-related | 107.21 | 57.05  | 90.51  | 71.84 | 123.58 | 50.56 | 208.53 | 8  | 0.370   |
|               |      | related     | 171.86 | 117.05 | 140.33 | 85.5  | 231.46 | 40.67 | 379.03 | 9  |         |
|               |      | overall     | 141.43 | 96.85  | 105.33 | 76.72 | 178.32 | 40.67 | 379.03 | 17 |         |
|               | 3rd  | Non-related | 79.79  | 56.18  | 60.92  | 37.55 | 134.27 | 21.89 | 144.31 | 5  | 0.833   |
|               |      | related     | 134.96 | 184.74 | 71.23  | 46.01 | 110.14 | 38.25 | 586.07 | 8  |         |
|               |      | overall     | 113.74 | 147.45 | 60.92  | 43.21 | 113.89 | 21.89 | 586.07 | 13 |         |
| IFN $\gamma$  | BL   | Non-related | 11.52  | 24.75  | 1.89   | 1.14  | 5.86   | 0.44  | 72.41  | 8  | 0.139   |
|               |      | related     | 52.04  | 76.2   | 12.75  | 5.36  | 61.7   | 0.54  | 233.91 | 9  |         |
|               |      | overall     | 32.97  | 60.05  | 5.36   | 1.25  | 44.35  | 0.44  | 233.91 | 17 |         |
|               | 2nd  | Non-related | 21.66  | 57.05  | 1.47   | 1.29  | 2.24   | 0.45  | 162.84 | 8  | 0.021   |
|               |      | related     | 67.24  | 121.82 | 5.81   | 3.68  | 58.07  | 1.5   | 359.61 | 9  |         |
|               |      | overall     | 45.79  | 96.92  | 2.27   | 1.5   | 5.95   | 0.45  | 359.61 | 17 |         |
|               | 3rd  | Non-related | 67.35  | 145.63 | 2.79   | 2.16  | 3.19   | 0.76  | 327.85 | 5  | 0.127   |
|               |      | related     | 78.04  | 68.47  | 64.04  | 37.84 | 104.29 | 3     | 206.18 | 8  |         |
|               |      | overall     | 73.93  | 99.16  | 48.64  | 3     | 92.06  | 0.76  | 327.85 | 13 |         |
| IL2           | BL   | Non-related | 2.9    | 3.48   | 1.19   | 1.05  | 3.16   | 0.61  | 10.77  | 8  | 0.059   |

|              |     |             |       |       |       |       |        |      |        |    |       |
|--------------|-----|-------------|-------|-------|-------|-------|--------|------|--------|----|-------|
|              |     | related     | 28.77 | 46.83 | 7.55  | 6.12  | 21.6   | 0.66 | 146.61 | 9  |       |
|              |     | overall     | 16.6  | 35.76 | 4.91  | 1.11  | 10.77  | 0.61 | 146.61 | 17 |       |
|              | 2nd | Non-related | 3.65  | 6.55  | 1.24  | 1.01  | 1.88   | 0.41 | 19.73  | 8  | 0.004 |
|              |     | related     | 31.26 | 43.78 | 14.72 | 10.75 | 24.02  | 2.92 | 142.96 | 9  |       |
|              |     | overall     | 18.27 | 34.33 | 8.1   | 1.31  | 16.35  | 0.41 | 142.96 | 17 |       |
|              | 3rd | Non-related | 4.82  | 8.32  | 1.05  | 0.75  | 1.96   | 0.68 | 19.68  | 5  | 0.045 |
|              |     | related     | 20.75 | 30.1  | 10.92 | 5.04  | 18.03  | 3.34 | 93.37  | 8  |       |
|              |     | overall     | 14.63 | 24.83 | 5.51  | 1.96  | 16.88  | 0.68 | 93.37  | 13 |       |
| IL10         | BL  | Non-related | 2.99  | 3.94  | 1.22  | 1     | 2.7    | 1    | 12.45  | 8  | 0.184 |
|              |     | related     | 8.44  | 9.88  | 4.1   | 1.14  | 9.79   | 1    | 28.53  | 9  |       |
|              |     | overall     | 5.87  | 7.96  | 1.95  | 1     | 7.78   | 1    | 28.53  | 17 |       |
|              | 2nd | Non-related | 2     | 1.82  | 1     | 0.93  | 3.04   | 0.26 | 5.41   | 8  | 0.053 |
|              |     | related     | 10.78 | 19.37 | 4.09  | 1.19  | 8.85   | 1    | 61.22  | 9  |       |
|              |     | overall     | 6.65  | 14.47 | 1.74  | 1     | 4.34   | 0.26 | 61.22  | 17 |       |
|              | 3rd | Non-related | 9.32  | 16.11 | 1     | 0.83  | 6.9    | 0.14 | 37.72  | 5  | 0.091 |
|              |     | related     | 32.38 | 28.22 | 35.11 | 1.42  | 60.28  | 1    | 63.23  | 8  |       |
|              |     | overall     | 23.51 | 26.22 | 6.9   | 1     | 39.92  | 0.14 | 63.23  | 13 |       |
| IL13         | BL  | Non-related | 3.51  | 6.92  | 1     | 1     | 1.12   | 0.96 | 20.62  | 8  | 0.042 |
|              |     | related     | 27.17 | 36.55 | 13.63 | 1     | 26.13  | 1    | 98.93  | 9  |       |
|              |     | overall     | 16.04 | 28.93 | 1     | 1     | 20.62  | 0.96 | 98.93  | 17 |       |
|              | 2nd | Non-related | 4.64  | 10.28 | 1     | 1     | 1.01   | 0.96 | 30.08  | 8  | 0.011 |
|              |     | related     | 51.33 | 74.9  | 14.51 | 10.59 | 36.09  | 1    | 184.11 | 9  |       |
|              |     | overall     | 29.36 | 58.55 | 5.61  | 1     | 18.35  | 0.96 | 184.11 | 17 |       |
|              | 3rd | Non-related | 7.13  | 14.05 | 1     | 0.88  | 1      | 0.53 | 32.26  | 5  | 0.010 |
|              |     | related     | 67.88 | 52.25 | 55.14 | 28.18 | 109.12 | 9.68 | 153.83 | 8  |       |
|              |     | overall     | 44.51 | 51.03 | 32.26 | 1     | 66.93  | 0.53 | 153.83 | 13 |       |
| TNF $\alpha$ | BL  | Non-related | 1.83  | 2.16  | 1.25  | 0.97  | 1.43   | 0.29 | 7.08   | 8  | 0.194 |
|              |     | related     | 12.62 | 19.85 | 3.1   | 1.11  | 7.23   | 0.46 | 47.44  | 9  |       |
|              |     | overall     | 7.54  | 15.16 | 1.43  | 1     | 3.97   | 0.29 | 47.44  | 17 |       |
|              | 2nd | Non-related | 2.39  | 4.75  | 0.76  | 0.59  | 1      | 0.2  | 14.13  | 8  | 0.014 |
|              |     | related     | 8.82  | 10.02 | 3.1   | 1.76  | 19.82  | 0.7  | 23.19  | 9  |       |
|              |     | overall     | 5.79  | 8.43  | 1.48  | 0.73  | 3.54   | 0.2  | 23.19  | 17 |       |
|              | 3rd | Non-related | 3.1   | 5.36  | 0.72  | 0.52  | 1.09   | 0.51 | 12.68  | 5  | 0.034 |
|              |     | related     | 11.53 | 10.38 | 6.25  | 3.24  | 22.13  | 2.3  | 27.1   | 8  |       |
|              |     | overall     | 8.29  | 9.52  | 3.42  | 1.09  | 12.68  | 0.51 | 27.1   | 13 |       |
| GM-CSF       | BL  | Non-related | 3.84  | 8.3   | 1.05  | 0.84  | 1.15   | 0.33 | 24.36  | 8  | 0.114 |
|              |     | related     | 21.35 | 34.87 | 11.65 | 2.82  | 18.43  | 0.44 | 111.87 | 9  |       |
|              |     | overall     | 13.11 | 26.82 | 1.33  | 0.94  | 13.77  | 0.33 | 111.87 | 17 |       |
|              | 2nd | Non-related | 5.22  | 12.47 | 0.78  | 0.52  | 1.25   | 0.34 | 36.05  | 8  | 0.004 |
|              |     | related     | 29.67 | 42.88 | 8.77  | 4.44  | 23.88  | 2.61 | 109.31 | 9  |       |
|              |     | overall     | 18.16 | 33.84 | 3.68  | 1     | 9.26   | 0.34 | 109.31 | 17 |       |
|              | 3rd | Non-related | 4.07  | 7.16  | 1.01  | 0.81  | 1.03   | 0.63 | 16.88  | 5  | 0.011 |
|              |     | related     | 33.75 | 39.12 | 28.11 | 9.56  | 31.32  | 6.39 | 126.68 | 8  |       |
|              |     | overall     | 22.33 | 33.7  | 10.33 | 1.03  | 28.94  | 0.63 | 126.68 | 13 |       |

**Figure S1:** Boxplots showing the median and distribution of lymphocyte proliferation as detected by thymidine incorporation assay (the stimulation indices are given) at three different time points for healthy controls (orange) and patients (green) after stimulation with CEFT antigen (CMV, EBV, influenza virus and Clostridium tetani antigen mix). Asterisk marks significant p-value (Baseline:  $p < 0.001$ ; 2<sup>nd</sup> vaccination:  $p < 0.001$ ).

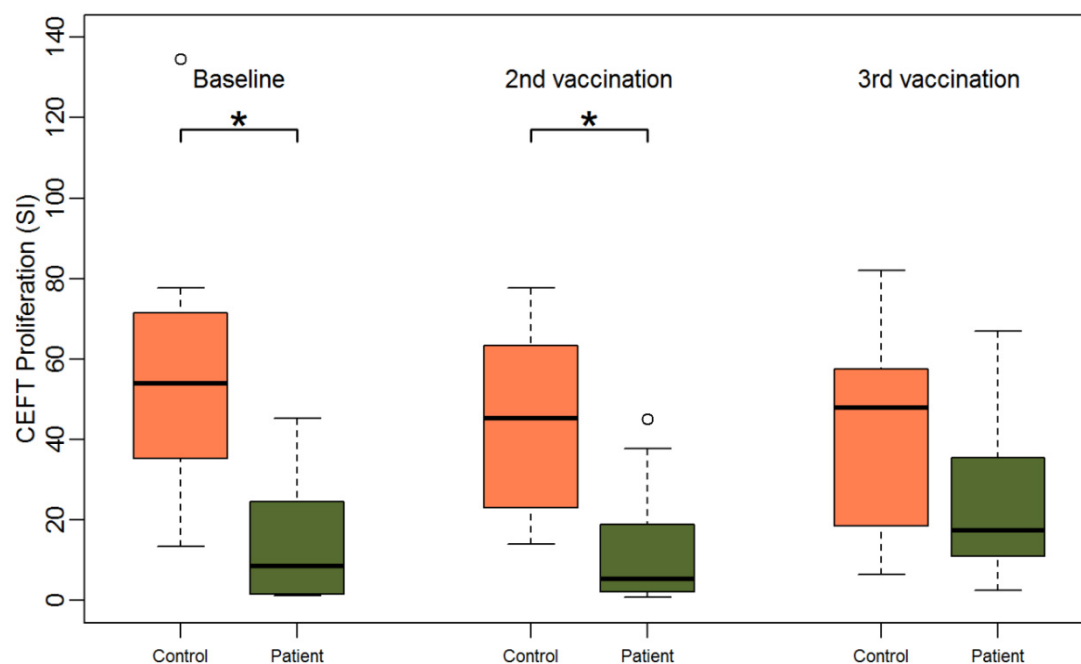

**Figure S2:** Boxplots showing the median and distribution of lymphocyte proliferation as detected by thymidine incorporation assay (the stimulation indices are given) at three different time points for healthy controls (orange) and patients (green) after stimulation with PMA (phorbole myristate acetate plus ionomycin). Asterisk marks significant p-value (Baseline:  $p=0.01$ ; 3<sup>rd</sup> vaccination:  $p=0.02$ ).

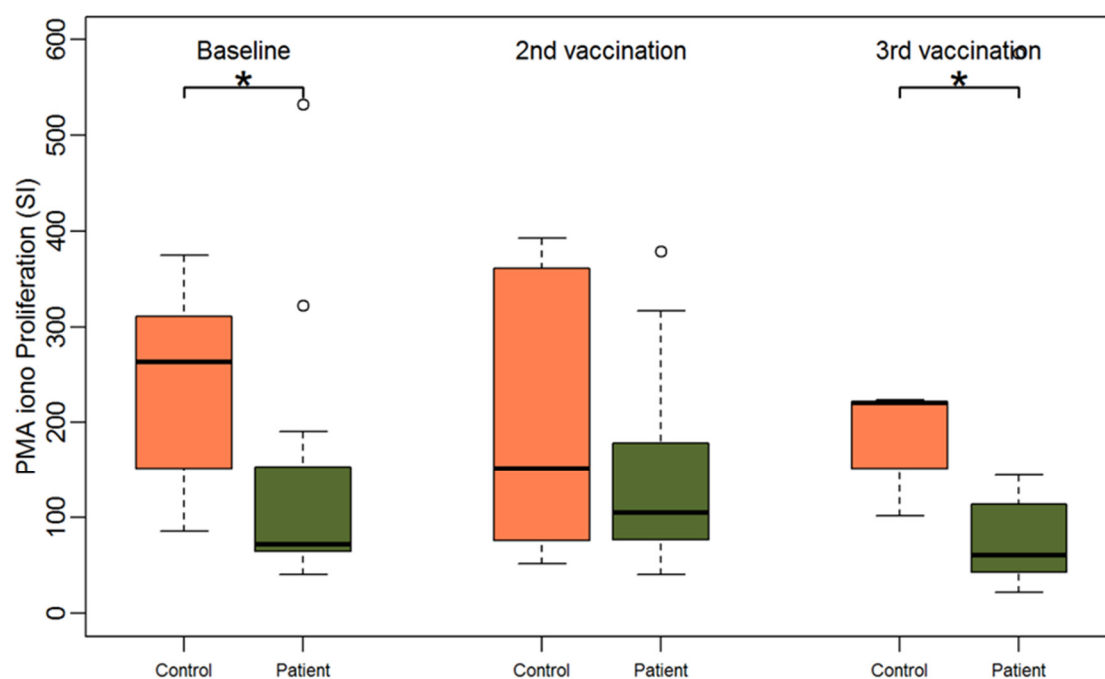

**Figure S3:** Boxplots showing the median and distribution of lymphocyte proliferation as detected by thymidine incorporation assay (the stimulation indices are given) at three different time points for humoral non-responders (orange) and responders (green) after stimulation with CEFT antigen (CMV, EBV, influenza virus and Clostridium tetani antigen mix). Asterisk marks significant p-value (Baseline:  $p=0.005$ ; 2<sup>nd</sup> vaccination:  $p=0.001$ ).

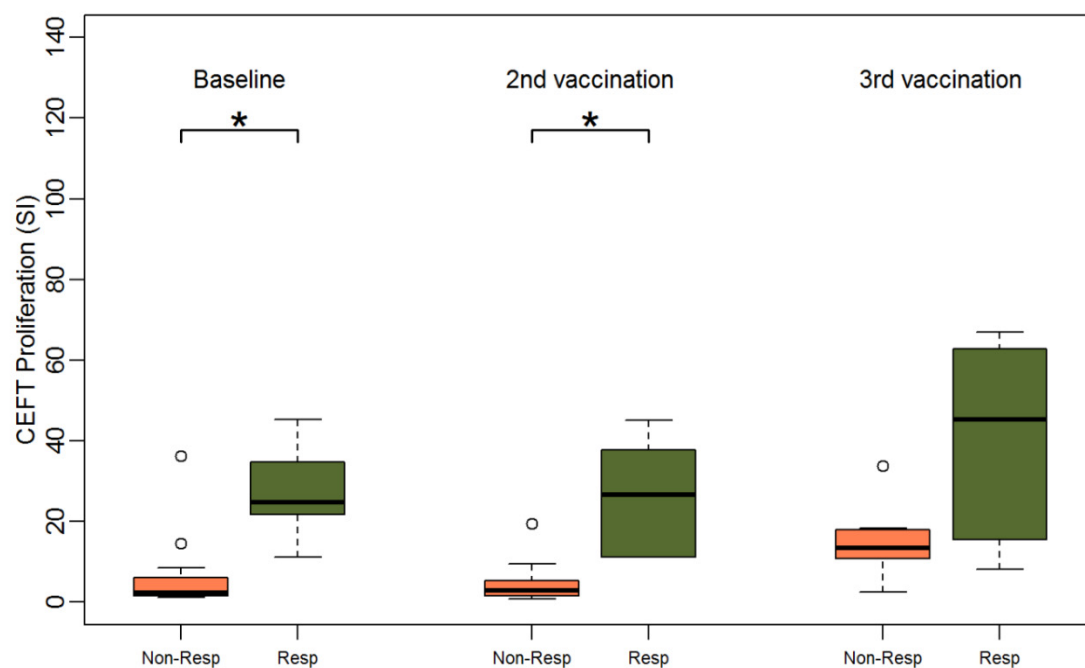

**Figure S4:** Boxplots showing the median and distribution of lymphocyte proliferation as detected by thymidine incorporation assay (the stimulation indices are given) at three different time points for humoral non-responders (orange) and responders (green) after stimulation with PMA (phorbole myristate acetate plus ionomycin).

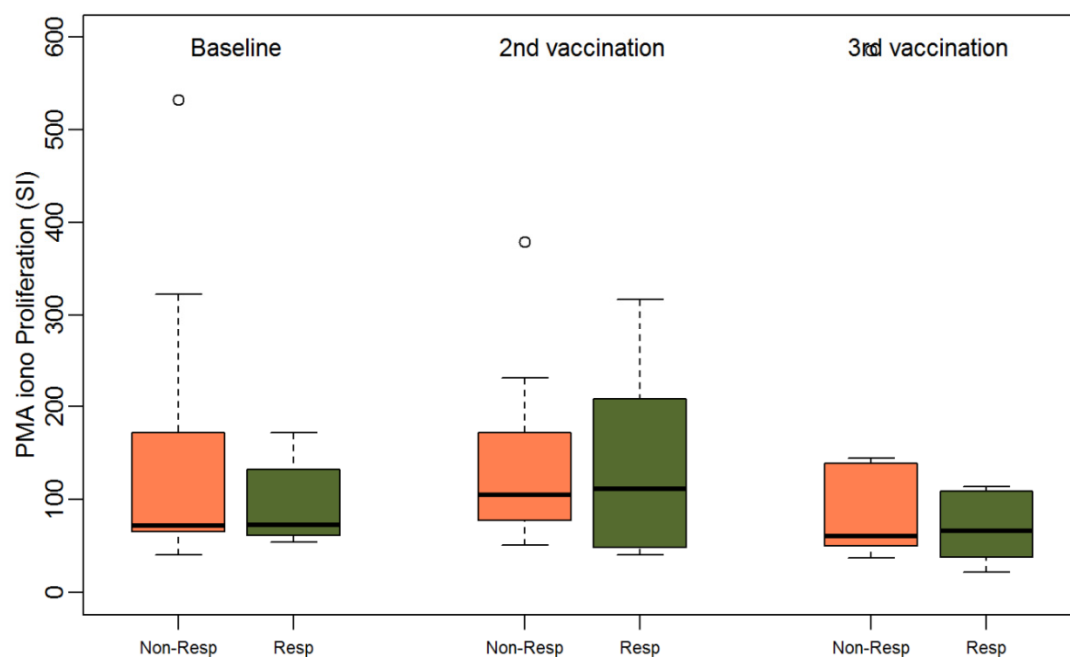

**Figure S5:** Correlation plot showing a significant correlation between TBE (tick-borne encephalitis antigen) lymphocyte proliferation and CEFT (CMV, EBV, influenza virus and Clostridium tetani antigen mix) lymphocyte proliferation values at baseline for patients ( $p=0.001$ , correlation coefficient: 0.71).

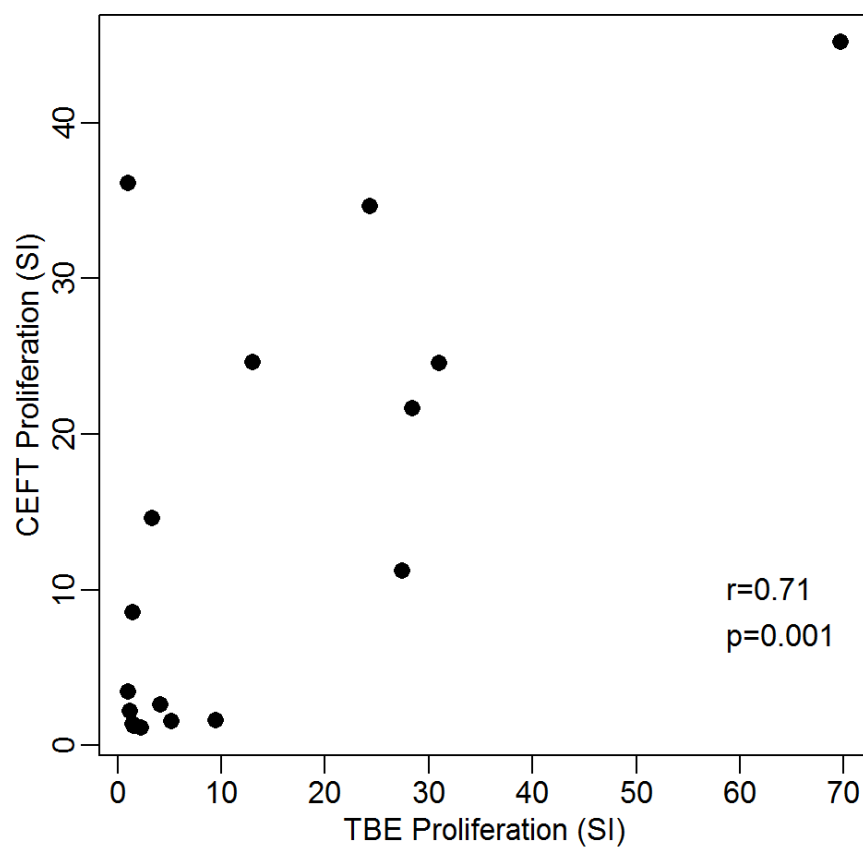

Supplement: s1 [file s1]
